# Supplementary material for: Elevated brain-derived cell-free DNA among patients with first psychotic episode – a proof-of-concept study
Source: eLife. 2022 Jun 14;11:e76391. doi: 10.7554/eLife.76391 (PMC9203052; doi:10.7554/eLife.76391)
Supplement: Source data 1. [file elife-76391-data1.xlsx]

## Sheet: Data Table
Sample	Gender	Age	Ast1 (GE/ml)	Ast2 (GE/ml)	Ast3 (GE/ml)	Average -Astrocyte (GE/ml)	Percents- Astrocyte		Neu1 (GE/ml)	Neu2(GE/ml)	Neu3 (GE/ml)	Neu4 (GE/ml)	Average- Neuron (GE/ml)	Percents- Neuron		Oligo1 (GE/ml)	Oligo2 (GE/ml)	Oligo3 (GE/ml)	Average- Oligodendrocyte (GE/ml)	Percents- Oligodendrocytes		Whole Brain1	Whole Brain2	Whole Brain3	Average- Whole Brain	Percents- Whole Brain		ng/ml	Total cfDNA (GE/ml)
			AST1	PRDM2	WOX				509	ITF	SLC	ZNF238				NMR	TAF8	ZFP				WB1	CG0978	UBE
PSY-AD 001	F	27	0	6.97119	1.96518	2.97879	0.100843		0	1.41695	0	0	0.354238	0.0119923		0	0	0	0	0		0	0.0172679	17.0902	5.70249	0.193051		9.74875	2953.87
PSY-AD 002	F	20	0	0	0.00748682	0.00249561	7.59838e-05		2.6653	0	0	0	0.666325	0.0202876		0	0	0	0	0		0	0	2.87438	0.958128	0.0291721		10.8396	3284.39
PSY-AD 003	F	25	10.7595	13.1389	0	7.96614	0.234449		0	0	0	0	0	0		0	0	0	0	0		0	0	0	0	0		11.2139	3397.81
PSY-AD 004	F	27	0	0	0	0	0		0	0	0	0	0	0		0	0	0	0	0		0	0	0	0	0		3.2725	991.567
PSY-AD 005	F	18	4.01728	3.19407	3.8049	3.67209	0.131372		1.85922	0	0	0	0.464806	0.0166289		0	0	0	0	0		0	0	14.5403	4.84677	0.173398		9.225	2795.17
PSY AD 006	F	33	4.5644	7.92828	23.7743	12.089	0.3625		6.69682	7.817	17.7791	15.8248	12.0294	0.360714		24.837	12.8846	0	12.5739	0.377039		0	8.32575	38.7639	15.6966	0.470676		11.0062	3334.89
PSY AD 007	M	25	0	10.727	0	3.57566	0.286081		1.72881	2.71052	0	0	1.10983	0.0887954		2.79791	0	0	0.932635	0.0746183		0	0	0	0	0		4.125	1249.88
PSY AD 008	M	20	0	6.43837	2.54969	2.99602	0.0970825		0	1.85959	0	0	0.464898	0.0150645		5.38242	0	1.9164	2.43294	0.0788365		0	0	0	0	0		10.185	3086.06
PSY AD 010	F	22	9.2557	0.126491	7.68029	5.68749	0.0817891		6.88951	5.87056	0	0.724737	3.3712	0.0484796		0	0	9.58011	3.19337	0.0459223		0	0	0	0	0		22.95	6953.85
PSY AD 011	M	23	16.1017	17.5561	25.2557	19.6378	0.488773		18.212	0	27.2114	0	11.3559	0.28264		0	0	7.8434	2.61447	0.0650724		0	71.4427	0	23.8142	0.592721		13.26	4017.78
PSY AD 012	F	20	1.56725	4.31405	2.39478	2.75869	0.120857		2.07581	3.22979	1.97076	0	1.81909	0.0796938		2.43463	1.05559	0.476654	1.32229	0.0579291		0	2.31972	2.41108	1.57693	0.0690848		7.53333	2282.6
PSY AD 013	F	35	0	7.19901	0.141661	2.44689	0.216213		0	0.0153123	0	0	0.00382809	0.000338258		0	0.0538164	0.0218413	0.0252192	0.00222843		0	0	0.0573945	0.0191315	0.0016905		3.735	1131.7
PSY AD 014	M	19	0	0	0	0	0		0	0	0	0	0	0		0	0	0	0	0		0	10.8745	0	3.62483	0.150479		7.95	2408.85
PSY AD 015	F	27	3.14036	0	0	1.04679	0.0533139		5.16692	0	7.35206	0	3.12975	0.159401		0	0	0	0	0		0	11.5829	0	3.86097	0.196643		6.48	1963.44
PSY AD 016	F	20	0	0	0	0	0		1.25742	0	4.84297	0	1.5251	0.139234		0	0	0	0	0		0	0	0	0	0		3.615	1095.35
PSY AD 017	F	28	0	9.6364	20.9107	10.1824	0.391669		0.81919	0	6.62256	0	1.86044	0.0715625		0	0	0	0	0		0	17.2008	0	5.73361	0.220545		8.58	2599.74
PSY AD 018	M	20	0	19.5673	0.0462519	6.53787	0.312712		12.5133	4.53756	0	1.13769	4.54713	0.217493		0	0	5.03029	1.67676	0.080201		85.9832	0.0858709	0	28.6897	1.37225		6.9	2090.7
PSY AD 019	M	20	4.24845	18.1403	12.7719	11.7202	0.545062		0	2.92946	0	2.72391	1.41334	0.0657291		0	0	4.55508	1.51836	0.070613		0	0	22.1069	7.36896	0.342702		7.09655	2150.26
PSY AD 020	F	21	0.0581246	0	6.08325	2.04713	0.168604		0	1.6459	8.00697	13.8066	5.86486	0.483036		3.18233	0	0	1.06078	0.0873668		0	0	0	0	0		4.00714	1214.16
PSY AD 021	M	19	14.76	0	0	4.91999	0.475146		7.24273	0	0		2.41424	0.233155		0		0	0	0								3.41739	1035.47
PSY AD 022	M	25	36.1417	30.5955	62.7276	43.1549	2.02309		80.2956	40.6485	53.042	24.2794	49.5664	2.32366		0		15.3778	7.6889	0.360453								7.04	2133.12
PSY AD 023	M	19	25.0882	10.0299	18.6985	17.9389	0.261387		0	4.31519	0	0	1.0788	0.0157192		0	0	8.86228	2.95409	0.0430441			70.2255	0	35.1128	0.511628		22.65	6862.95
PSY AD 024	F	48	3.49348	0	0	1.16449	0.0358509		0	0.437021	0	0	0.109255	0.00336361		0		10.6045	5.30225	0.163239			0		0	0		10.72	3248.16
PSY-AD 025	F	19	4.96463	0	0	1.65488	0.0650195		0	0	0	0	0	0		0	0	0	0	0			0	0	0	0		8.4	2545.2
PSY-AD 026	M	20	0	0	0	0	0		0	0	0		0	0		0			0	0								2.952	894.456
PSY-AD 027	M	28	0	0	0	0	0		0	0	0		0	0		0		0	0	0								2.48824	753.935
PSY-AD 029	M	31	0	9.24487	0	3.08162	0.0130389		0	0	6.50337	161.072	41.8938	0.177261		0	0	0	0	0		0	0	0	0	0		78	23634
PSY-AD 030	F	22	0	0	0	0	0		0	0	0	0	0	0		0		0	0	0			0		0	0		5.475	1658.92
PSY-AD 031	M	27	0		0	0	0		0	8.17609	0		2.72536	0.130059		0		0	0	0								6.91579	2095.48
Control 01	F	37	0.037964	0	0	0.0126547	0.000797794		2.88447	0	0	0	0.721118	0.0454618		0	0	0	0	0		0	4.26222	0	1.42074	0.0895685		5.235	1586.2
Control 02	F	50	1.29969	0	12.5205	4.60673	0.238342		0	0	0	0	0	0		0	0	0	0	0		0	0	0	0	0		6.37895	1932.82
Control 03	F	36	0	0	0	0	0		0	0	0	0	0	0		0	0	0	0	0		6.65482	0	3.46984	3.37488	0.185174		6.015	1822.55
Control 04	F	30	0	4.24502	0	1.41501	0.107356		0	0	0	1.5743	0.393574	0.0298603		0	0	0	0	0		0	0	0	0	0		4.35	1318.05
Control 05	F	45	0	0	0	0	0		0	0	15.1188	0	3.77971	0.205846		0	13.1409	0	4.38029	0.238554		4.36876	0	0	1.45625	0.0793089		6.06	1836.18
Control 06	M	28	0		0	0	0		0	0	0	0	0	0		0	0	0	0	0		0	0	0	0	0		9.52105	2884.88
Control 07	M	34	0	0	45.421	15.1403	0.839017		0	0	0	0	0	0		0	1.99353	0	0.664509	0.0368244		0	0	0	0	0		5.95556	1804.53
Control 08	M	33	0	0	0	0	0		0	0	0	0	0	0		0	0	0	0	0			0	0	0	0		4.83	1463.49
Control 09	F	50	0	0	0	0	0		0	0	0	0	0	0		0	0	0	0	0			0	0	0	0		5.00571	1516.73
Control 10	M	57	0	0	0	0	0		14.1276	0	0	0	3.5319	0.219106		0	0	0	0	0			0	0	0	0		5.32	1611.96
Control 11	M	24	0	0	6.03148	2.01049	0.13301		0	0	0	0	0	0		0	0	0	0	0			0	0	0	0		4.98857	1511.54
Control 12	F	43	0	2.64027	3.94698	2.19575	0.0939098		0	0	0	0	0	0		0		0	0	0			0		0	0		7.71667	2338.15
Control 13	F	22	0	0.208736	0	0.0695787	0.00232304		0	0	0.247779	0	0.0619448	0.00206817		0	0	0	0	0			0	0	0	0		9.885	2995.15
Control 14	F	22	0	0	0	0	0		0	0	4.01127	0.996333	1.2519	0.056676		0	0	0	0	0			0	0	0	0		7.29	2208.87
Control 15	M	33	0	0	0.0273232	0.00910774	0.000472619		0	0	0	9.84255	2.46064	0.127687		0	0	0	0	0		0	0	0	0	0		6.36	1927.08
Control 16	F	35	0	4.09685	0	1.36562	0.0860934		0	0	0	0	0	0		0	0	0	0	0		0	0	0	0	0		5.235	1586.2
Control 17	M	30	0	0	11.401	3.80032	0.148405		0	0	0	0	0	0		0	0	0	0	0		0	1.47596	0	0.491985	0.0192123		8.45143	2560.78
Control 18	F	24	0	0	0	0	0		0	0	0	0	0	0		0	0	0	0	0			0	0	0	0		4.155	1258.97
Control 19	F	29	0	0	0	0	0		0	0	0	4.15371	1.03843	0.0827815		0	0	0	0	0		0	0	0	0	0		4.14	1254.42
Control 20	M	24	0	0	0.546189	0.182063	0.00890174		0	0	0	0	0	0		5.43967	0	0	1.81322	0.0886554		0	0	1.58506	0.528352	0.0258331		6.75	2045.25
Control 21	M	29	0	0	0	0	0		0	0	0	0	0	0		0	0	0	0	0		0	0	0	0	0		6.38571	1934.87
Control 22	F	31	0	0	0	0	0		4.17767	0	0	0	1.04442	0.128123		0	0	0	0	0		0	0	0	0	0		2.69032	815.168
Control 23	M	38	0	0	0	0	0		0	0	0	0	0	0		0.154881	0	0	0.051627	0.00180112		0	0	0	0	0		9.46	2866.38
Control 24	F	22	0	3.74688	0	1.24896	0.140203		0	0	0	0	0	0		0	0	8.20785	2.73595	0.307127		0	0	0	0	0		2.94	890.82
Control 25	F	30	0	0.294901	0	0.0983004	0.0161405		0	0	0	0	0	0		0	0	0	0	0			0	0	0	0		2.01	609.03
Control 26	F	33	0	0	0	0	0		0	0	0	0.335517	0.0838792	0.00550903		0	0	0	0	0		0	2.25054	0	0.750179	0.0492704		5.025	1522.58
Control 27	F	28	0	0	0	0	0		0	0	0	16.1038	4.02596	0.344669		0	0	0	0	0		0	0	0	0	0		3.855	1168.07
Control 28	F	28	0	6.73248	0.0217557	2.25141	0.207309		0	0	0	0	0	0		0	0	0	0	0		0	0	0	0	0		3.58421	1086.02
Control 29	M	28	0	0	0.353675	0.117892	0.0103342		0	0	0	0.890411	0.222603	0.019513		0	0	0	0	0		0	0	0	0	0		3.765	1140.8
Control 30	F	27	0	0	0	0	0		0	0	0	0	0	0		0	0	0	0	0		0	0	0	0	0		4.05	1227.15
Control 31	M	23	0	0	8.94318	2.98106	0.119638		0	0	0	0	0	0		0	0	0	0	0		0	0	0	0	0		8.22353	2491.73

## Sheet: Clinical data -Controls
Demographical data and clinical features that could affect cfDNA plasma levels of volunteers (control group)
Gender
Females	19 (61.3%)
Males	12 (38.7%)
Average age (Years, SD)	32 (8.9)
Physical health at blood sampling
Acute health conditions	None
Chronic non active health conditions (Hypothyroidism, Migraines, Crohn's disease)	3 (9.7 %)
Physical activity prior to blood sampling
Acute exercise (less then an hour and a half prior to blood sampling)	None
Physical activity 1.5-14 hours prior to blood sampling	None
Physical activity 14-24 hours prior to blood sampling	5 (16%)
Physical activity more than 24 hours prior to blood sampling	26 (84%)

## Sheet: Clinical data -Patients
Demographical and clinical data of patients
Gender
Females	16 (55.2%)
Males	13 (44.8%)
Average age (Years, SD)	24 (6.43)
Average years of education (Years, SD)	12.1 (0.86)
Marital status
Single	23 (79.3%)
Married	3 (10.3%)
Divorced	3 (10.3%)
Children
No children	22 (75.9%)
1-3 children	7 (24.1%)
Physical health
Physically healthy	26 (89.7%)
Chronic no active conditions at sampling ( Asthma,Hypothyroidism,Crohn's)	3 (10.3%)
Family history of psychiatric disorders
Yes	14 (48.3%)
No	15 (51.7%)
Number of episodes
First episode	21 (72.4%)
Second or third psychotic event (up to a year after the beginning of the first episode)	8 (27.6%)
Type of initial hospitalization
Compulsory hospitalization	23 (79.3%)
Voluntary hospitalization	6 (20.7%)
Duration of the current episode prior to hospitalization
1-30 days	23 (79.3%)
30-90 days	4 (13.8%)
Over 90 days	2 (6.9%)
Duration of current hospitalization (pre- blood sampling )
1-30 days	15 (51.7%)
30-90 days	10 (34.5%)
Over 90 days	4 (13.8%)
Drug use
No	13 (44.8%)
Yes	16 (55.2%)
Type of drugs , when used
Cannabis only	9 (56.2%)
Combination of drugs	7 (43.8%)

## Sheet: Antipsychotic drugs- Patients
Drug group	Drug (generic)
FGA	Haloperidol
	Fluphenazine
	Perphenazine
	Zuclopenthixol
	Levomepromazine
SGA	Amisulpride
	Aripiprazole
	Paliperidone
	Olanzapine
	Quetiapine
	Quetiapine fumarate extended release
	Risperidone
	Clotiapine
SAI	Clotiapine injectable
	Olanzapine injectable
	Zuclopenthixol acetate
LAI	Haloperidol decanoate
	Paliperidone injectable
	Risperidone LAI
	Zuclopenthixol decanoate
FGA – First generation antipsychotic, SGA – Second generation antipsychotic, SAI – Short acting injection, LAI – Long acting injection.
Drug group	Percentage of patients taking at least one drug in the drug group
FGA	0.3793
SGA	1
SAI	0.5862
LAI	0.2414
Drug group	Percentage of patients taking at least one drug in the drug group before the blood test
FGA	0.3448
SGA	1
SAI	0.5517
LAI	0.2069
Drug group	Drug (generic)	Percentage of patients taking the drug
FGA	Haloperidol	0.1379
	Fluphenazine	0.0345
	Perphenazine	0.0345
	Zuclopenthixol	0.2414
	Levomepromazine	0.0345
SGA	Amisulpride	0.0345
	Aripiprazole	0.0345
	Paliperidone	0.1724
	Olanzapine	0.5862
	Quetiapine	0.2759
	Quetiapine fumarate extended release	0.069
	Risperidone	0.3793
	Clotiapine	0.4483
SAI	Clotiapine injectable	0.2759
	Olanzapine injectable	0.2069
	Zuclopenthixol acetate	0.3793
LAI	Haloperidol decanoate	0.0345
	Paliperidone injectable	0.1379
	Risperidone LAI	0.0345
	Zuclopenthixol decanoate	0.0345

## Sheet: Non-antipsychotic drugs-Patient
Drug group	Drug (generic)
Adrenergic agonist	Budesonide Formoterol
	Salbutamol
Adrenergic antagonist	Propranolol
	Atenolol
	Tamsulosin
Antibiotics	Prednisolone, gentamicin
	Amoxicillin, clavulanic acid
	Triamcinolone, gramicidine, nystatin, neomycin
	Ertapenem
	Amoxicillin
Anticholinergic	Biperiden
Anticonvulsants	Sodium valproate
Antidepressant	Escitalopram
	Fluvoxamine
	Sertraline
	Paroxetine
	Trazodone
Antidiarrheals	Loperamide
Antifungal	Nystatin
	Clotrimazole
Antihistamine	Promethazine
Antihypertensive drugs	Losartan, hydrochlorothiazide
Benzodiazepines	Diazepam
	Brotizolam
	Clonazepam
	Lorazepam
	Oxazepam
Cholinergic agonist	Nicotine
Dietary / nutritional supplements	Enteral nutrition formulas
	Ferrous calcium citrate
	Folic acid
	Multi vitamins
	Vitamin B12
Intravenous solutions	Dextrose
	Sodium lactate
	Normal saline
	Saline
Laxatives	Lactulose
	Bisacodyl
Mood stabilizers	Lithium
Nonbenzodiazepines	Zopiclone
Pain killers	Acetaminophen
	Acetaminophen, aspirin
	Ibuprofen
	Dipyrone
PPIs	Omeprazole
	Esomeprazole
Thyroid hormone receptor agonist	Levothyroxine

## Sheet: CNS markers -Sequences
Marker	Cell Type	Forward Primer	Reverse Primer	Cluster CG#	Chr	Start	End	Amplicon length	Amplicon
WB1	Whole-brain	ATTTGATTTTGTGGTAGTGGA	AAAATCCCCACCTCTACTTAA	cg02619656	16	72460052	72460163	112	ACTTGATTCTGCCGCAGTGGAGCCAGCACAGCGGATGTTTTCACACCCAGCAAGACAAAGGCCGTCGTCTCCGCCATGACACTGTTCCGTTCCAAGCAGAGGCCGGGATTCT
CG0978	Whole-brain	TATATGTGTGTAGGTTGAATAAAAT	TCCATTTCATATCAATACTAATATT	cg09787504	10	3283855	3283972	118	CACATGTGTGCACGCTGAATAAAATCGTGCTGCGGGACCACAGTGCGGGGAGGCACCGACTCTGTCATTCTGTCAACGCACCGCACAGTCACGAACATCAGCATTGACATGAAATGGA
UBE	Whole-brain	TTTAGTGTTAGAATTGAAAGAGTAGA	TTAACCTTAACTATATCTAACAAAAA	cg23661000	1	10239948	10240057	110	CTCAGTGCCAGAACTGAAAGAGCAGATTCAGGCGTGGATGAGAGAGAAACAGAACAGCGATCACTAAACCGTTCCGCCGCCCACCCTCTGCTAGACACAGCCAAGGCCAA
