# Supplementary figures and images for: Elevated brain-derived cell-free DNA among patients with first psychotic episode – a proof-of-concept study
Source: eLife journal article supplement (doi:10.7554/elife.76391), 2022-06-07

Figure 1-figure supplement 1

A

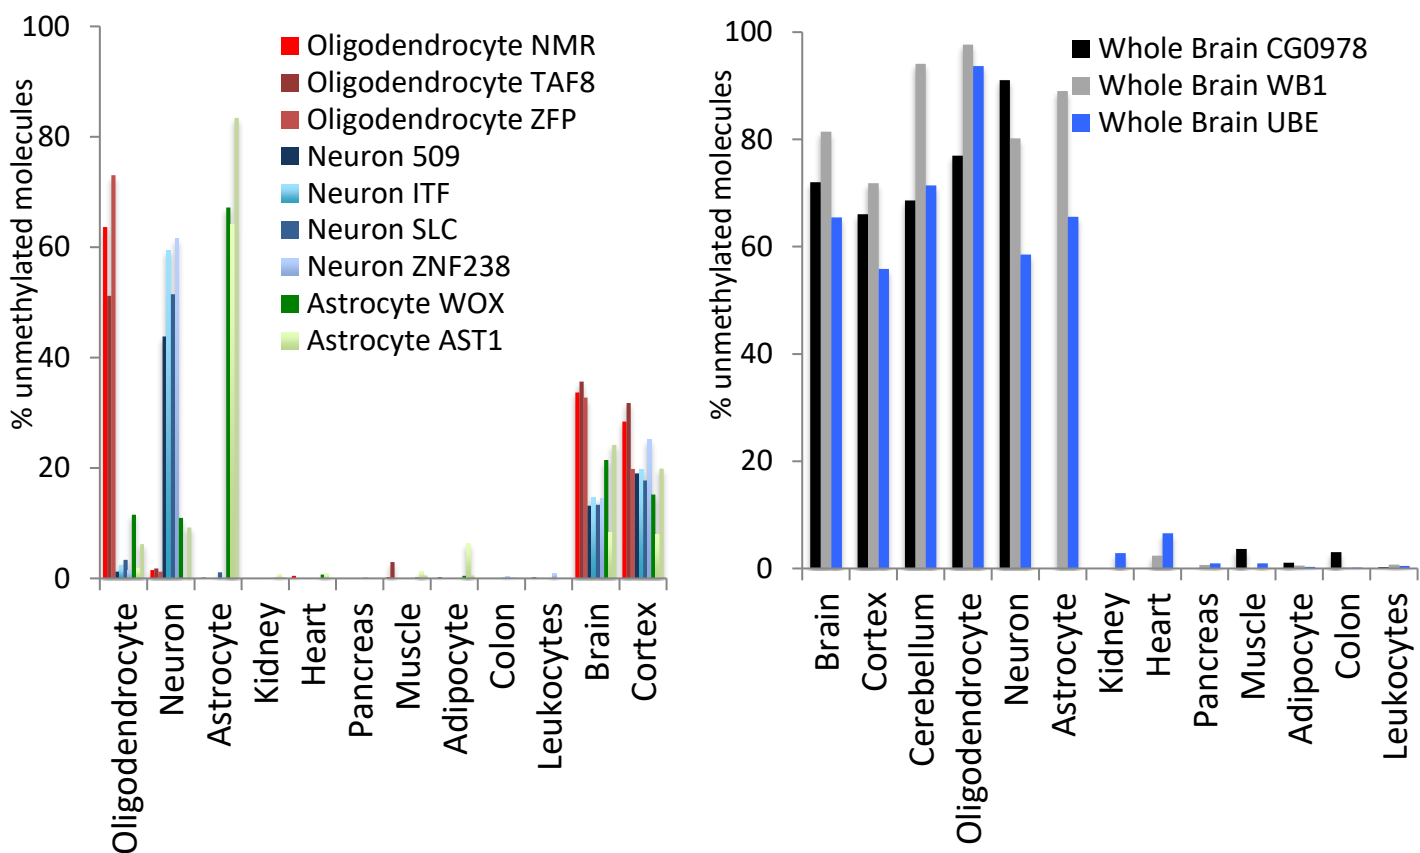

B

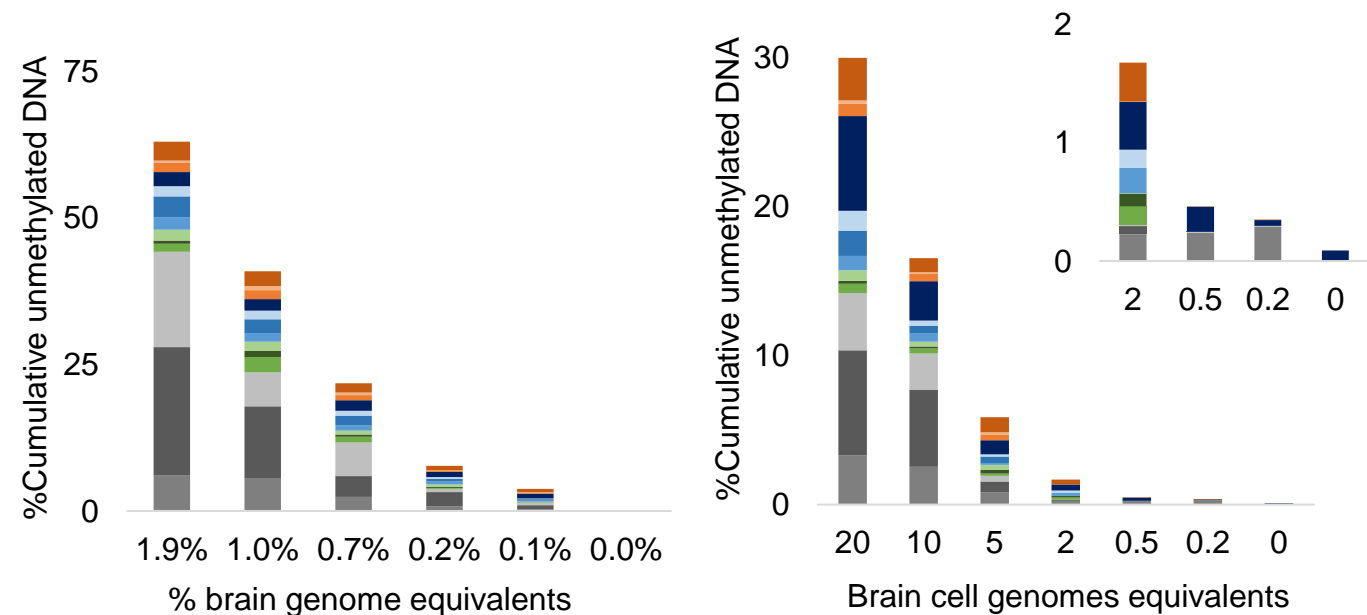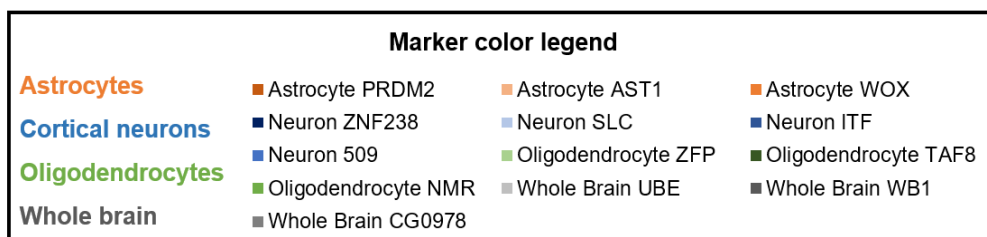

Supplement: supp [file elife-76391-supp-v1.zip]

Figure 1-figure supplement 2

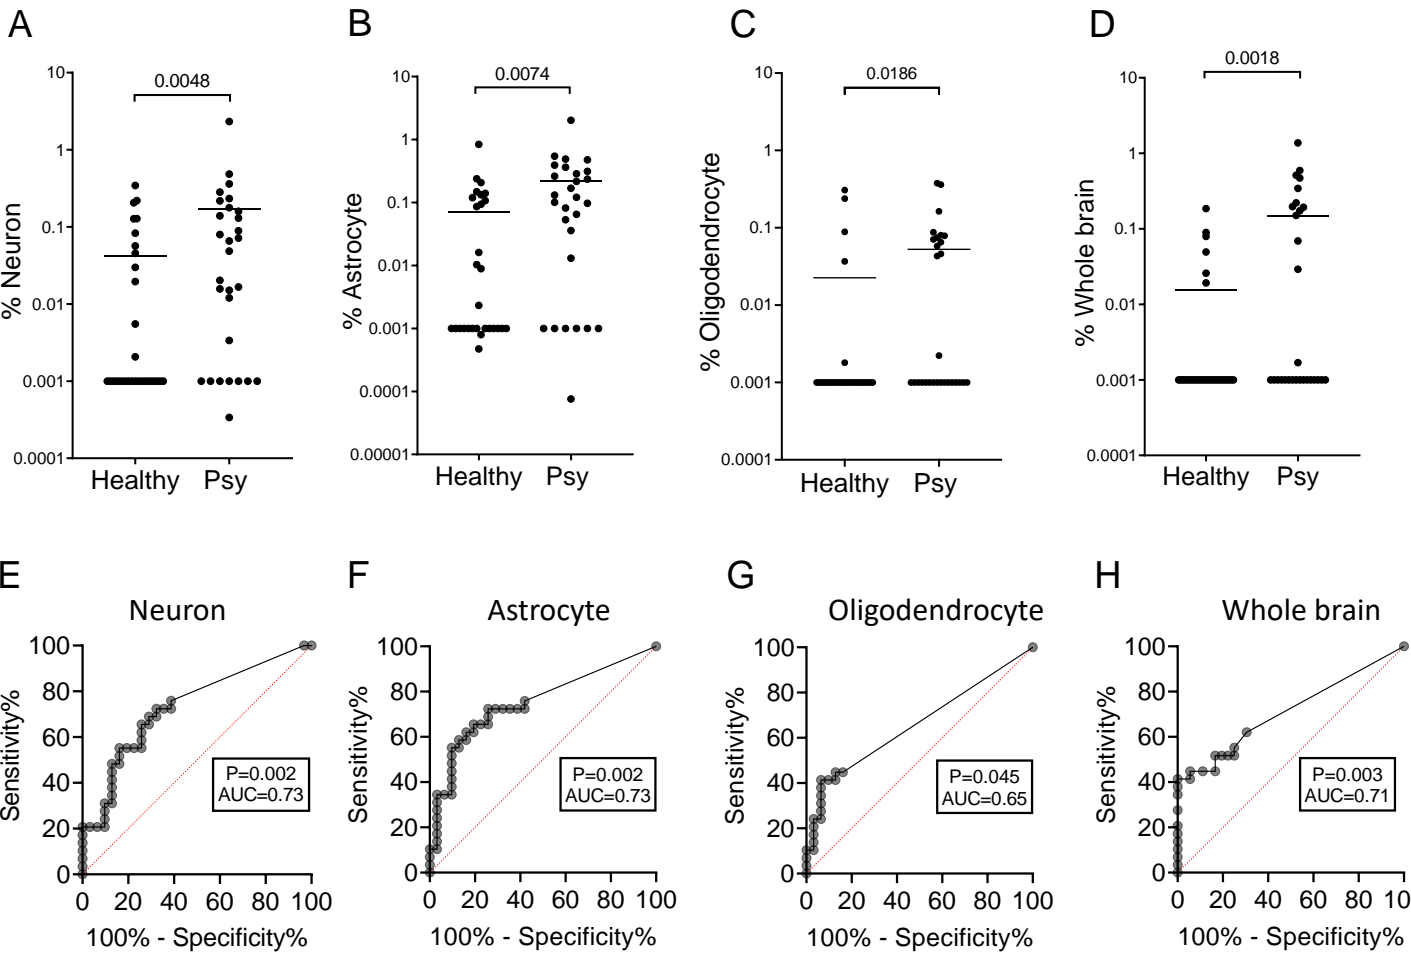

Supplement: supp [file elife-76391-supp-v1.zip]
